# Supplementary material for: Enhanced Inner-Ear Organoid Formation from Mouse Embryonic Stem Cells by Photobiomodulation
Source: PubMed Central journal article supplement — Mol Ther Methods Clin Dev. 2020 Mar 13;17:556–67. doi: 10.1016/j.omtm.2020.03.010 (PMC7118273; doi:10.1016/j.omtm.2020.03.010), 2020-03-13
Supplement: mmc1.pdf [file mmc1.pdf]

**OMTM, Volume 17**

**Supplemental Information**

**Enhanced Inner-Ear Organoid Formation**

**from Mouse Embryonic Stem Cells**

**by Photobiomodulation**

**So-Young Chang, Nathaniel T. Carpena, Seyoung Mun, Jae Yun Jung, Phil-Sang Chung, Hosup Shim, Kyudong Han, Jin-Chul Ahn, and Min Young Lee**

## SUPPLEMENTARY FIGURES

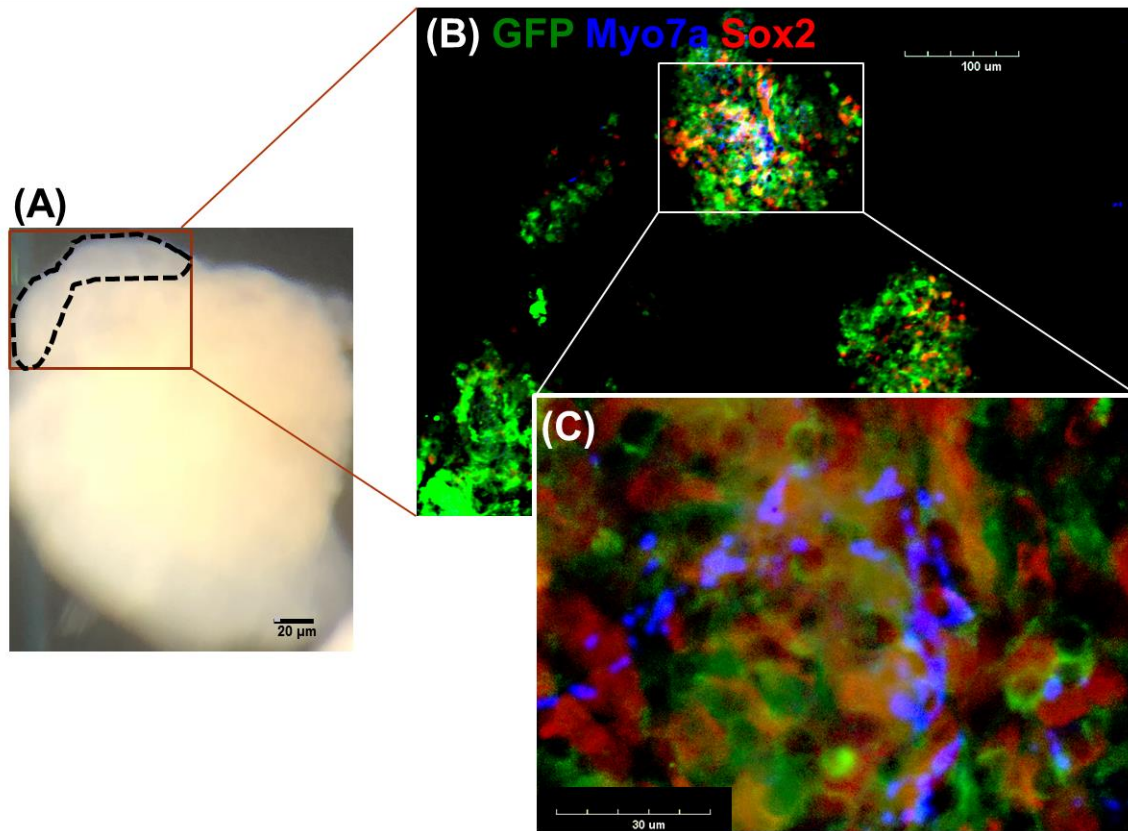

**Supplementary Figure 1. Observation of Myosin VIIa positive cells in the organoid (mounted after dissection)**

At 18 day of differentiation, tissues were fixed and prepared for the epifluorescence analysis. Image (A) is showing the organoids at the time point of histologic analysis. Tissues within the broken line of Image (A) is dissected to expose the inner surface of organoid and then mounted with the inner surface on top of slide glass. In the epifluorescence analysis of the tissue, Myosin VIIa positive cells (blue) and Sox2 positive cells (red) inside the organoid was observed at the lower (B) and higher magnification (C). Scale bars in each image are different size, size are marked in each separate images.

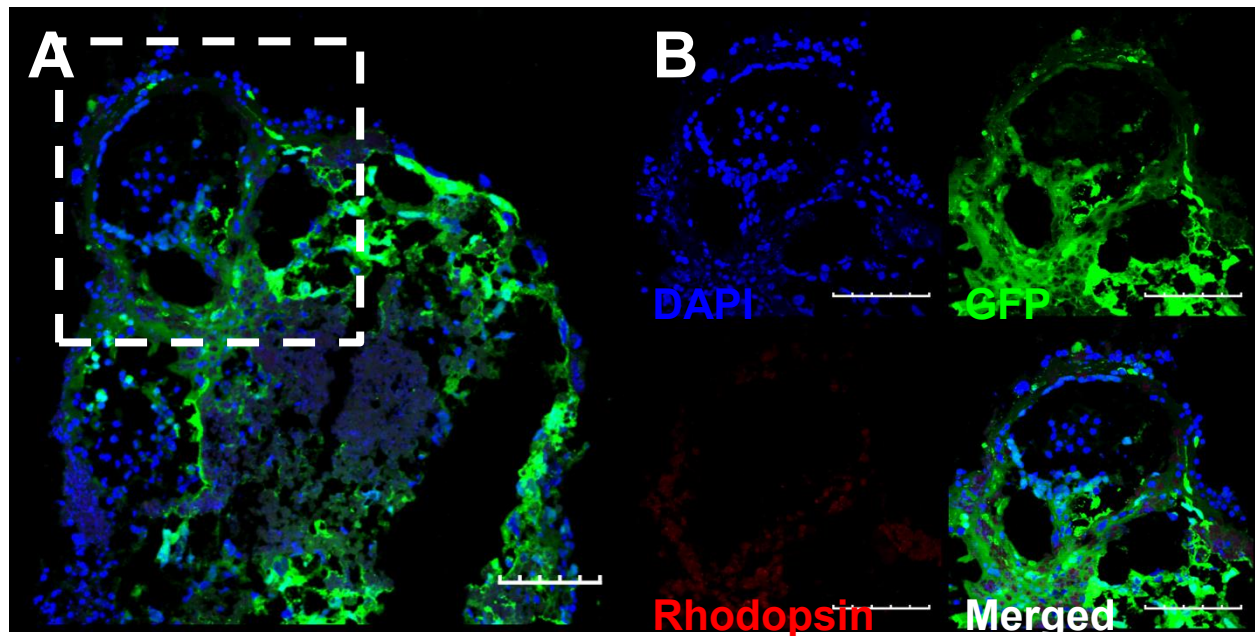

**Supplementary Figure 2. Epifluorescence analysis of organoid showing Rhodopsin positive cell**

Rhodopsin staining was done to exclude the possibility of PBM inducing ESCs differentiating into other Myo7a positive expressing cells such as the photoreceptor progenitors in the optic cup. (A) Low magnification showing the EB with organoids and (B) high magnification images (dotted rectangle in low magnification) showing the absence of possible photoreceptor progenitors. Scale bars indicate 100µm.

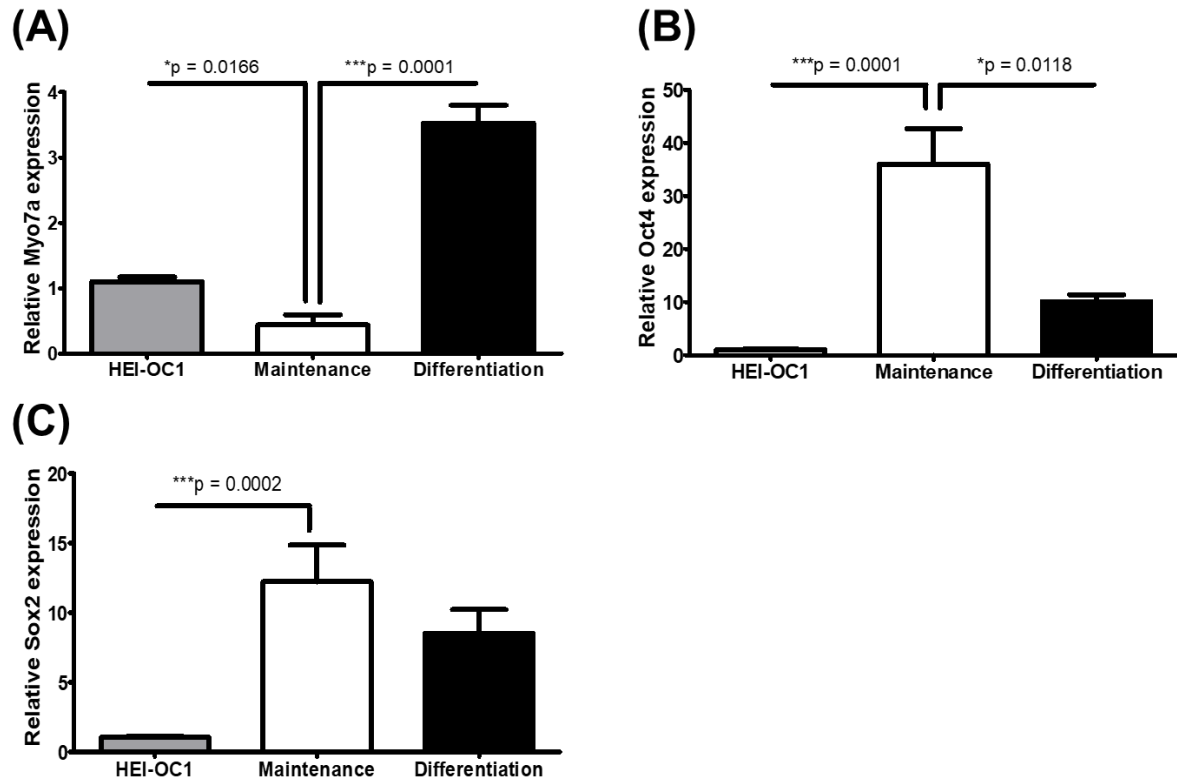

**Supplementary. Figure 3. Detection of Myosin VIIa, Oct4 and Sox2 with real-time polymerase chain reaction (RT PCR)**

Using the RT-PCR test, DNA expression of markers of stem cell, hair cell was observed. Statistically higher ratio of Myosin VIIa DNA expression was observed in both HEI-OC1 cell (Gray; auditory cell line) and differentiated (Black; day 18) organoids compared to maintenance (prior to differentiation process; white) (A). Statistically higher ratio of Oct4 DNA expression compared to the two other cell conditions was observed in maintenance (B). Significant higher rate of Sox2 DNA expression compared to HEI-OC1 cell was observed in maintenance stem cells (C). \*p < 0.05, \*\*p < 0.01 and \*\*\*p < 0.001.

**(A) Major axis**

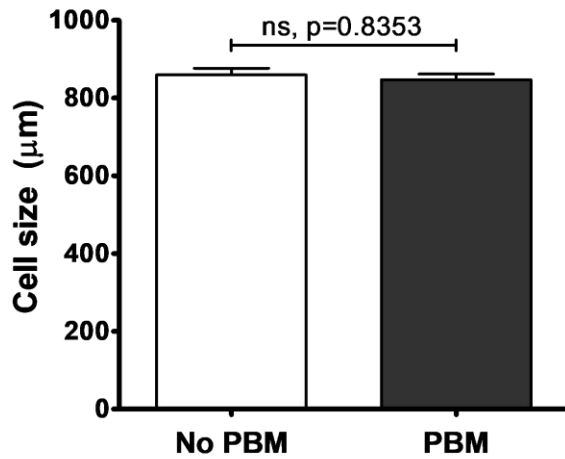

**(B) Minor axis**

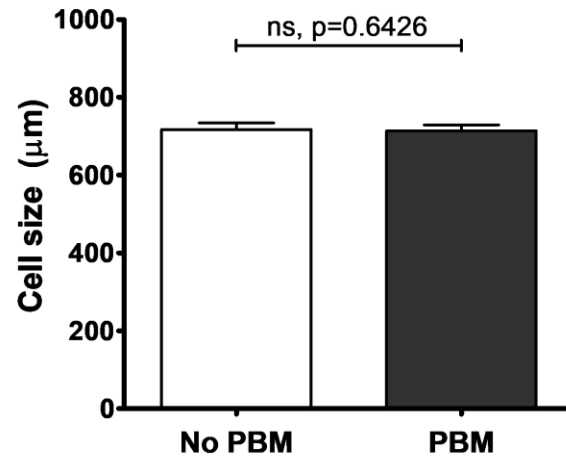

**Supplementary. Figure 4. Diameters of EBs at 14 days after initiation of otic differentiation**

Major axis (longest diameter, A) and minor axis (shortest diameter, B) were respectively measured in both PBM and no- PBM group. Both major and minor axis were not significantly different between PBM and no-PBM group (Major axis: two tailed Man Whitney test:  $U = 433.5$   $p = 0.8353$ ; Minor axis: two tailed Man Whitney test:  $U = 416.5$   $p = 0.8353$ ).

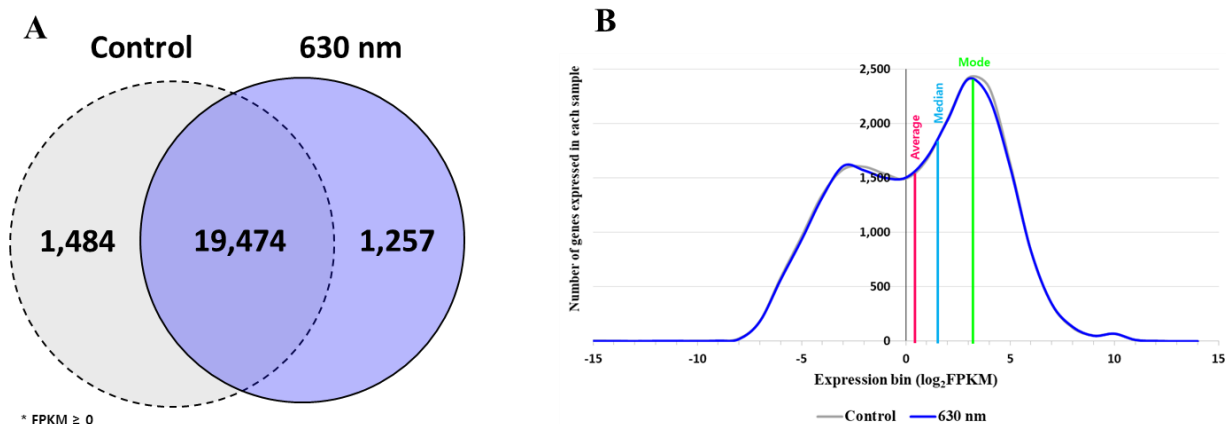

**Supplementary Figure 5. Bioinformatic analysis for gene expression profile**

(A) Summary of total expressed genes in two cases of inner ear hair cell-like cell (Control and 630 nm). The number of unique and shared genes from two cases of EB represented in the Venn diagram. A total of 19,474 genes are commonly expressed in all cases. (B) The comparison diagram of gene expression level. Distribution of FPKM values for the expressed genes in Control and 630 nm represented with grey and blue curve, respectively. An average, median, and mode value of FPKM are indicated by green, sky, pink lines, respectively. The distribution density was similar for two samples.

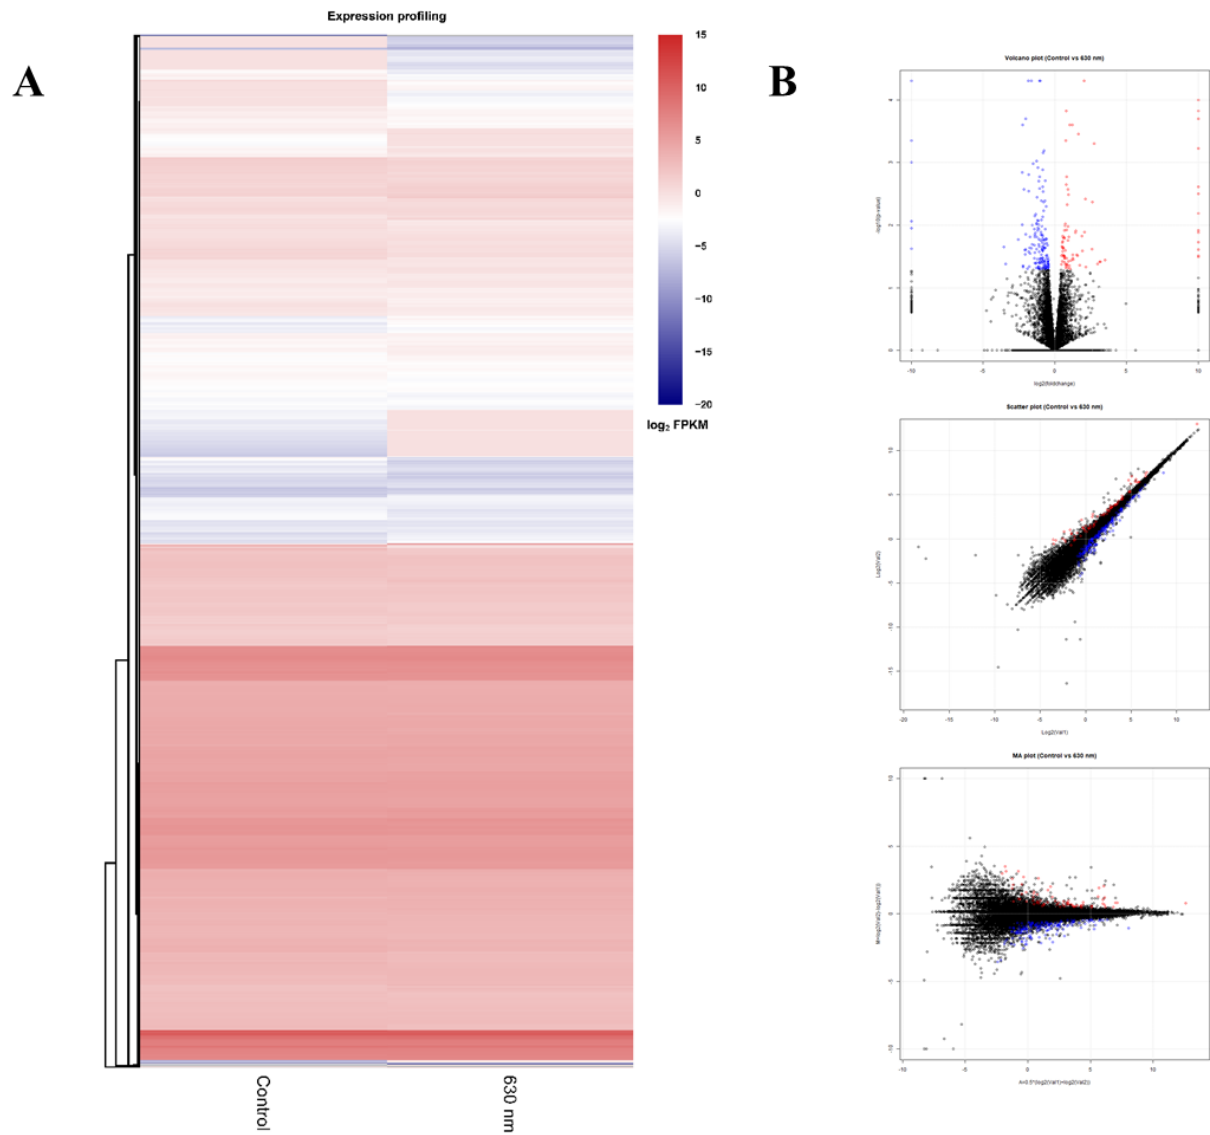

**Supplementary Figure 6. Hierarchical clustering analysis of all expressed genes (22,215) and statistical comparison of DEGs**

(A) (B) The FPKM volcano, scatter, and MA plots constructed by pairwise comparison between Control and 630 nm. Red and blue dots in this statistical analysis represent the statistically significant up- and down-regulated DEGs. The middle line in black dots indicated no difference at the mean expression values between samples. The number of down-regulate DEGs were higher than up-regulate DEGs in PBM-irradiated EBs.

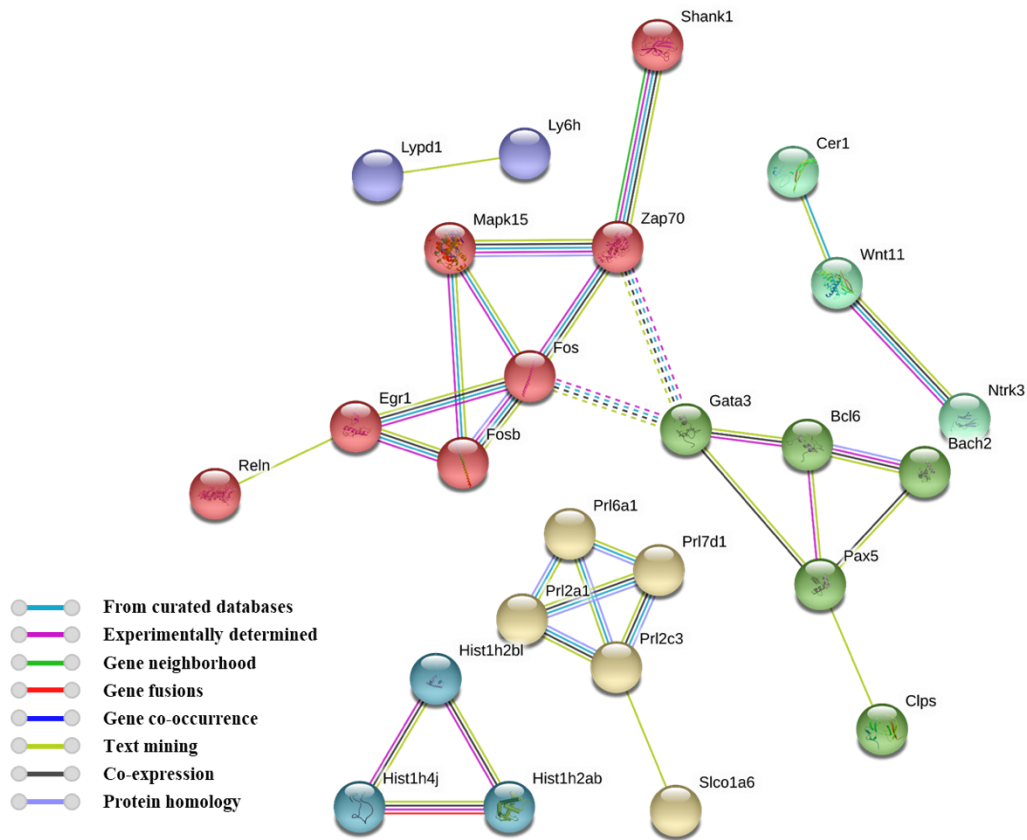

**Supplementary Figure 7. Protein–protein interaction network based on DEGs**

The network containing 25 out of 43 identified proteins was mapped by the STRING: functional protein association networks analysis based on various evidence. Each evidences are indicated by different line colors as shown in the legend. In the evidence view, nodes and edged indicated genes and the interaction between the nodes. As shown, most of the proteins in this network were found to be closely related to each other.

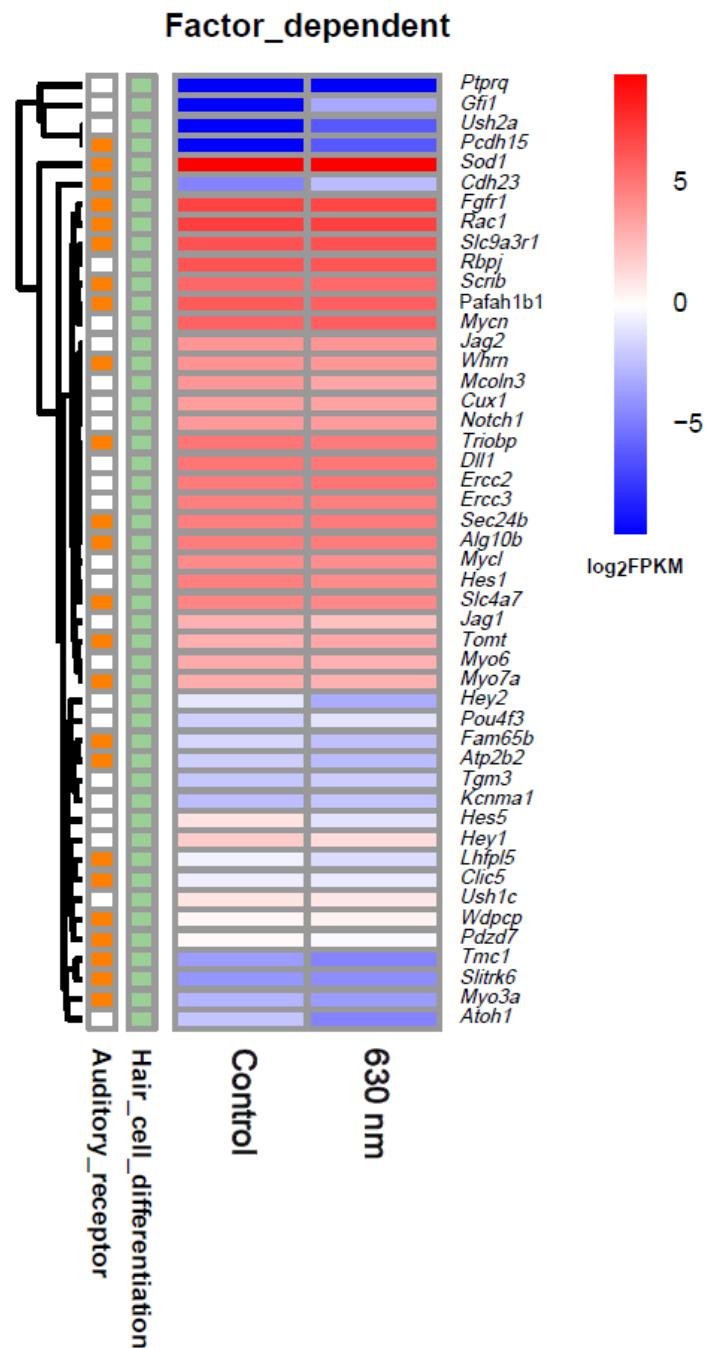

**Supplementary Figure 8. Gene expression profiling of reference gene related with hair cell sensory system**

Gene expression profiling of the auditory receptor and hair cell differentiation-related genes obtained from the Amigo2 database was performed. Log<sub>2</sub>-transformed FPKM values were used for creating the heatmap. As shown in the figure, hair cell sensory system-related genes showed similar pattern of transcriptional expression. A detailed gene expression value for these genes was annotated at Supplementary Table 4

**Supplementary Table 1. Summary statistics for RNA sequencing data**

| Case   | Raw data   | After filtering (%) | Mapped reads (%)   | Uniquely mapped reads (%) | Ensembl 77 (40,993 coding genes)<br>Mus musculus |                      |
|--------|------------|---------------------|--------------------|---------------------------|--------------------------------------------------|----------------------|
|        |            |                     |                    |                           | Expressed genes<br>(FPKM > 0)                    | Unexpressed<br>genes |
| Con    | 58,667,412 | 56,952,536 (97.1%)  | 53,233,180 (93.5%) | 50,054,468 (87.9%)        | 20,958                                           | 20,035               |
| 630 nm | 55,266,616 | 53,390,754 (96.6%)  | 49,641,737 (93%)   | 46,558,351 (87.2%)        | 20,731                                           | 20,262               |

**Supplementary Table 2. Expression level of 155 DEGs (attached as separated excel file)**

**Supplementary Table 3. Gene ontology analysis for DEGs using DAVID functional annotation tool v6.8 (<https://david-d.ncifcrf.gov>)**

| Category                              |                    | Term                                                                                                                     | Count  | P-Value                                     | Genes                                           |
|---------------------------------------|--------------------|--------------------------------------------------------------------------------------------------------------------------|--------|---------------------------------------------|-------------------------------------------------|
| Up regulated                          | Biological Process | GO:0006366~transcription from RNA polymerase II promoter                                                                 | 4      | 0.0002                                      | EGR1, FOS, NMI, FOSB                            |
|                                       |                    | GO:0051412~response to corticosterone                                                                                    | 2      | 0.0184                                      | FOS, FOSB                                       |
|                                       |                    | GO:0032570~response to progesterone                                                                                      | 2      | 0.0262                                      | FOS, FOSB                                       |
|                                       |                    | GO:0007616~long-term memory                                                                                              | 2      | 0.0297                                      | EGR1, SHANK1                                    |
|                                       |                    | GO:0032870~cellular response to hormone stimulus                                                                         | 2      | 0.0408                                      | FOS, FOSB                                       |
|                                       |                    | GO:0051591~response to cAMP                                                                                              | 2      | 0.0442                                      | FOS, FOSB                                       |
|                                       | Cellular Component | GO:0071277~cellular response to calcium ion                                                                              | 2      | 0.0459                                      | FOS, FOSB                                       |
|                                       |                    | GO:0035914~skeletal muscle cell differentiation                                                                          | 2      | 0.0476                                      | EGR1, FOS                                       |
|                                       |                    | GO:0005654~nucleoplasm                                                                                                   | 6      | 0.0119                                      | EGR1, TEX12, FOS, NMI, HIST1H2BL, HIST1H4J      |
|                                       | Molecular Function | GO:0003690~double-stranded DNA binding                                                                                   | 3      | 0.0059                                      | EGR1, FOS, FOSB                                 |
|                                       |                    | GO:0003677~DNA binding                                                                                                   | 6      | 0.0160                                      | HIST1H2AB, EGR1, FOS, HIST1H2BL, FOSB, HIST1H4J |
|                                       |                    | GO:0001077~transcriptional activator activity, RNA polymerase II core promoter proximal region sequence-specific binding | 3      | 0.0219                                      | EGR1, FOS, FOSB                                 |
| GO:0007399~nervous system development |                    | 7                                                                                                                        | 0.0020 | NTRK3, CER1, FEZF1, APOB, HES5, GATA3, PAX5 |                                                 |

|                   |                       |                                                                                 |    |        |                                                                                                     |
|-------------------|-----------------------|---------------------------------------------------------------------------------|----|--------|-----------------------------------------------------------------------------------------------------|
| Down<br>regulated | Biological<br>Process | GO:0010628~positive regulation of gene expression                               | 7  | 0.0026 | NTRK3, APOB, GATA3, WNT11, SOX17, CTSH, QK                                                          |
|                   |                       | GO:0006805~xenobiotic metabolic process                                         | 3  | 0.0031 | CYP1B1, CYP26A1, SLCO1A6                                                                            |
|                   |                       | GO:0006508~proteolysis                                                          | 8  | 0.0040 | NRIP3, AGBL3, CTSJ, RELN, PGA5, TMPRSS12, CTSH, PRSS12                                              |
|                   |                       | GO:0001764~neuron migration                                                     | 4  | 0.0093 | NTRK3, FEZF1, GATA3, RELN                                                                           |
|                   |                       | GO:0000122~negative regulation of transcription from RNA polymerase II promoter | 8  | 0.0131 | FEZF1, BACH2, HES5, GATA3, MAPK15, PAX5, BCL6, SOX17                                                |
|                   |                       | GO:0072086~specification of loop of Henle identity                              | 2  | 0.0139 | HES5, IRX2                                                                                          |
|                   |                       | GO:0045893~positive regulation of transcription, DNA-templated                  | 7  | 0.0149 | FEZF1, HES5, GATA3, PAX5, LHX5, WNT11, SOX17                                                        |
|                   |                       | GO:0030178~negative regulation of Wnt signaling pathway                         | 3  | 0.0163 | CER1, CXXC4, SOX17                                                                                  |
|                   |                       | GO:0045061~thymic T cell selection                                              | 2  | 0.0173 | GATA3, ZAP70                                                                                        |
|                   |                       | GO:0071300~cellular response to retinoic acid                                   | 3  | 0.0216 | NTRK3, LTK, CYP26A1                                                                                 |
|                   | Cellular<br>Component | GO:0006355~regulation of transcription, DNA-templated                           | 15 | 0.0231 | BACH2, IRX2, PAX5, FOXO6, FEZF1, HES5, GATA3, ZFP300, LHX5, BCL6, GM12258, SOX17, SP8, FOXD4, NHLH1 |
|                   |                       | GO:0095500~acetylcholine receptor signaling pathway                             | 2  | 0.0241 | LYPD1, LY6H                                                                                         |
|                   |                       | GO:0007275~multicellular organism development                                   | 9  | 0.0258 | NTRK3, FEZF1, HES5, PAQR7, PAX5, WNT11, RELN, NHLH1, QK                                             |
|                   |                       | GO:0031638~zymogen activation                                                   | 2  | 0.0343 | CTSH, PRSS12                                                                                        |
|                   |                       | GO:0042074~cell migration involved in gastrulation                              | 2  | 0.0377 | CER1, SOX17                                                                                         |
|                   |                       | GO:0008285~negative regulation of cell proliferation                            | 5  | 0.0448 | CER1, FEZF1, CYP1B1, GATA3, BCL6                                                                    |
|                   |                       | GO:0007169~transmembrane receptor protein tyrosine kinase signaling pathway     | 3  | 0.0476 | NTRK3, LTK, ZAP70                                                                                   |
|                   |                       | GO:0001775~cell activation                                                      | 2  | 0.0477 | LYPD1, GATA3                                                                                        |
|                   |                       | GO:0045666~positive regulation of neuron differentiation                        | 3  | 0.0487 | RNF112, FEZF1, BCL6                                                                                 |
|                   |                       | GO:0005576~extracellular region                                                 | 14 | 0.0033 | CER1, LYPD1, PRL6A1, PRL7D1, PRL2A1, PRL2C3, APOB, CLPS, CHIL1, RELN, STC1, WNT11, PGA5, PRSS12     |
|                   |                       | GO:0005615~extracellular space                                                  | 10 | 0.0494 | PRL2C3, CER1, APOB, CTSJ, CHIL1, WNT11, STC1, RELN, PRL7D1, CTSH                                    |
|                   |                       | GO:0005179~hormone activity                                                     | 5  | 0.0008 | PRL2C3, PRL6A1, STC1, PRL7D1, PRL2A1                                                                |

|                       |                                                                                           |    |        |                                                                                              |
|-----------------------|-------------------------------------------------------------------------------------------|----|--------|----------------------------------------------------------------------------------------------|
| Molecular<br>Function | GO:0043565~sequence-specific DNA binding                                                  | 8  | 0.0083 | BACH2, GATA3, IRX2, LHX5, BCL6, SOX17, FOXD4,<br>FOXO6                                       |
|                       | GO:0008233~peptidase activity                                                             | 7  | 0.0115 | AGBL3, CTSJ, RELN, PGA5, TMPRSS12, CTSH, PRSS12                                              |
|                       | GO:0003700~transcription factor activity, sequence-specific DNA binding                   | 9  | 0.0150 | BACH2, ZFP300, GATA3, PAX5, BCL6, GM12258,<br>SOX17, FOXD4, FOXO6                            |
|                       | GO:0003677~DNA binding                                                                    | 14 | 0.0153 | BACH2, IRX2, PAX5, CXXC4, FOXO6, FEZF1, HES5,<br>GATA3, LHX5, BCL6, SOX17, SP8, FOXD4, NHLH1 |
|                       | GO:0030550~acetylcholine receptor inhibitor activity                                      | 2  | 0.0218 | LYPD1, LY6H                                                                                  |
|                       | GO:0000981~RNA polymerase II transcription factor activity, sequence-specific DNA binding | 4  | 0.0261 | SOX17, FOXD4, NHLH1, FOXO6                                                                   |
|                       | GO:0033130~acetylcholine receptor binding                                                 | 2  | 0.0432 | LYPD1, LY6H                                                                                  |

**Supplementary Table 4. Hair cell associated processes (attached as separated excel file)**

**Table S5.** Antibodies and stains used for cell identification

| Antibody                 | Host   | Supplier           | Cat. No. | Dilution   |
|--------------------------|--------|--------------------|----------|------------|
| Brn3c                    | Mouse  | Santa Cruz         | SC81980  | 1:50       |
| Calcium Green-1 AM       |        | Invitrogen         | C3011MP  | 4 $\mu$ M  |
| E-cadherin               | Mouse  | BD Bioscience      | 610181   | 1:200      |
| FM1-43 (SynaptoGreen C4) |        | Biotium            | 70022    | 5 $\mu$ M  |
| H <sub>2</sub> DCFDA     |        | Invitrogen         | D399     | 20 $\mu$ M |
| Laminin- $\beta$ 1       | Rabbit | Abcam              | AB109293 | 1:50       |
| Myosin VIIa              | Rabbit | Proteus Bioscience | 25-6790  | 1:100      |
| Pax8                     | Rabbit | Abcam              | AB97477  | 1:100      |
| Sox1                     | Goat   | R&D Systems        | AF3369   | 1:100      |
| Sox2                     | Mouse  | BD Pharmigen       | 561489   | 1:100      |
| Tubb3                    | Mouse  | Biolegend          | 801201   | 1:500      |
